# Supplementary material
Source: PubMed Central journal article supplement (PMC7681021)
Supplement: supp_RA120.013961_160268_1_supp_590690_qfzl36.pdf [file supp_RA120.013961_160268_1_supp_590690_qfzl36.pdf]

| (a) Sample details                                                                                              |                                               |                                                   |                                                          |
|-----------------------------------------------------------------------------------------------------------------|-----------------------------------------------|---------------------------------------------------|----------------------------------------------------------|
| Organism                                                                                                        | MS2 VLP<br><i>Escherichia phage MS2</i>       | Bacteriophage MS2<br><i>Escherichia phage MS2</i> | MS2 RNA<br><i>Escherichia phage MS2</i>                  |
| Source (Catalogue No. or reference)                                                                             | E.Coli Expression Plasmid synthesised by ATUM | ATCC® 15597-B1™                                   | Sigma-Roche 10165948001                                  |
| Description: sequence                                                                                           | P03612                                        | N/A                                               | N/A                                                      |
| Molecular mass $M$ from chemical composition (Da)                                                               | 13728 Da<br>(2.48MDa as VLP)                  | 3.7MDa                                            | 1.6 M Da                                                 |
| Solvent composition and source                                                                                  | 50mM Tris HCl pH 7.5 150mM NaCl               | 50mM Tris HCl pH 7.5 150mM NaCl                   | 50mM Tris HCl pH 7.5 150mM NaCl (1mM MgCl <sub>2</sub> ) |
| (b) SAS data collection parameters                                                                              |                                               |                                                   |                                                          |
| Source, instrument and description or reference                                                                 | Advanced Photon Source: BioCat                |                                                   |                                                          |
| Wavelength (Å)                                                                                                  | 10.3 Å                                        |                                                   |                                                          |
| Sample to detector distance                                                                                     | 3.69m                                         |                                                   |                                                          |
| $q$ -measurement range                                                                                          | 0.01-0.35 Å                                   |                                                   |                                                          |
| Basis for normalization to constant counts                                                                      | Diode                                         |                                                   |                                                          |
| Sample temperature (°C)                                                                                         | 22°C                                          |                                                   |                                                          |
| (c) Software employed for SAS data reduction, analysis and interpretation                                       |                                               |                                                   |                                                          |
| SAS data reduction to sample–solvent scattering, and extrapolation, merging, desmearing <i>etc.</i> as relevant | BioXTAS RAW                                   |                                                   |                                                          |
| Basic analyses: Guinier, $P(r)$                                                                                 | BioXTAS RAW; ATSAS GNOM                       |                                                   |                                                          |
| Shape/bead modelling                                                                                            | ATSAS: MONSA & DAMMIF                         |                                                   |                                                          |
| Molecular graphics                                                                                              | USCF CHIMMERA                                 |                                                   |                                                          |

| <i>(e)</i> MONSA Modelling            |                             |                              |                              |                              |                              |
|---------------------------------------|-----------------------------|------------------------------|------------------------------|------------------------------|------------------------------|
| <i>Bacterophage MS2</i><br><i>at:</i> | <b>0%</b><br><b>Sucrose</b> | <b>40%</b><br><b>Sucrose</b> | <b>50%</b><br><b>Sucrose</b> | <b>60%</b><br><b>Sucrose</b> | <b>65%</b><br><b>Sucrose</b> |
| <i>q</i> -range for fitting           | 0.005-<br>0.35              | 0.005-0.35                   | 0.005-<br>0.35               | 0.01-0.35                    | 0.01-0.35                    |
| Symmetry/anisotropy<br>assumptions    | None                        | None                         | None                         | None                         | None                         |
| <i>c</i> <sup>2</sup> value/range     | 2.65                        | 5.05                         | 4.88                         | 6.3                          | 12.3                         |
| <b>Multiphase<br/>Properties</b>      |                             | <b>Rg:</b>                   |                              | <b>Volume:</b>               |                              |
| Protein Phase<br>Properties           |                             | 114.9                        |                              | 6.30E+06                     |                              |
| RNA Phase<br>Properties               |                             | 96.52                        |                              | 5.10E+06                     |                              |
